# Supplementary material for: Hydrothermal synthesis of two 2D uranyl coordination polymers: structure, luminescence, and photocatalytic degradation of rhodamine B
Source: Royal Society of Chemistry journal article supplement (doi:10.1039/d0ce01091j), 2020-01-01
Supplement: d0ce01091j1.pdf [file d0ce01091j1.pdf]

# Hydrothermal Synthesis of Two 2D Uranyl Coordination Polymers, Structures, Luminescence, and Photocatalytic

## Degradation of Rhodamine B

Xiaolan Tong,<sup>a</sup> Shan Wang,<sup>a</sup> HongXia Gao,<sup>b</sup> Yingchong Ge,<sup>a</sup> Jun Zuo,<sup>a</sup> Fen Liu,<sup>a</sup>

Jianhua Ding<sup>\*a</sup> and Jianbo Xiong<sup>\*a</sup>

<sup>†a</sup> State Key Laboratory of Nuclear Resources and Environment School of Chemistry, Biology and Materials Science, East

China University of Technology, Nanchang 330013, P. R. China. Email: [xiongjianbo1210@163.com](mailto:xiongjianbo1210@163.com)

<sup>†b</sup> School of Earth Science, East China University of Technology, Nanchang 330013, P. R. China.

## Supporting materials

Table S1 Selected bond length (Å) and angles (°) for **1** and **2**

| <b>1</b>                                                                                              |            |                    |            |
|-------------------------------------------------------------------------------------------------------|------------|--------------------|------------|
| <b>Bond length</b>                                                                                    |            |                    |            |
| U(1)-O(5)                                                                                             | 1.747(3)   | U(1)-O(6)          | 1.741(3)   |
| U(1)-O(2)#3                                                                                           | 2.361(3)   | U(1)-O(1)#2        | 2.288(3)   |
| U(1)-O(4)                                                                                             | 2.416(3)   | U(1)-O(3)#4        | 2.475(3)   |
| U(1)-O(3)                                                                                             | 2.595(3)   |                    |            |
| <b>Bond angles</b>                                                                                    |            |                    |            |
| O(2)#3-U(1)-O(4)                                                                                      | 154.30(10) | O(2)#3-U(1)-O(3)#4 | 75.40(9)   |
| O(2)#3-U(1)-O(3)                                                                                      | 153.47(9)  | O(5)-U(1)-O(2)#3   | 85.18(12)  |
| O(5)-U(1)-O(1)#2                                                                                      | 93.43(12)  | O(5)-U(1)-O(4)     | 90.93(12)  |
| O(5)-U(1)-O(3)                                                                                        | 91.07(11)  | O(5)-U(1)-O(3)#4   | 96.18(11)  |
| O(1)#2-U(1)-O(2)#3                                                                                    | 79.36(10)  | O(1)#2-U(1)-O(4)   | 126.29(10) |
| O(1)#2-U(1)-O(3)                                                                                      | 74.65(9)   | O(1)#2-U(1)-O(3)#4 | 152.06(10) |
| O(4)-U(1)-O(3)                                                                                        | 51.74(9)   | O(4)-U(1)-O(3)#4   | 79.79(9)   |
| O(3)#4-U(1)-O(3)                                                                                      | 131.13(11) | O(6)-U(1)-O(2)#3   | 97.09(12)  |
| O(6)-U(1)-O(5)                                                                                        | 177.56(13) | O(6)-U(1)-O(1)#2   | 86.10(12)  |
| O(6)-U(1)-O(4)                                                                                        | 87.42(12)  | O(6)-U(1)-O(3)     | 86.49(11)  |
| O(6)-U(1)-O(3)#4                                                                                      | 85.31(11)  |                    |            |
| Symmetrical code: #1 x+1,y-1,z-1; #2 1-x,-y,-z; #3 x+1,y,z-1; #4 -x,y+3/2,-z+1/2; #5 -x,y+3/2,-z+3/2. |            |                    |            |
| <b>2</b>                                                                                              |            |                    |            |
| <b>Bond length</b>                                                                                    |            |                    |            |
| U(1)-O(1)                                                                                             | 2.360(3)   | U(1)-O(2)#1        | 2.321(3)   |
| U(1)-O(3)#2                                                                                           | 2.474(4)   | U(1)-O(4)#2        | 2.426(4)   |
| U(1)-O(5)                                                                                             | 2.341(4)   | U(1)-O(6)          | 1.756(4)   |
| U(1)-O(7)                                                                                             | 1.756(4)   |                    |            |

**Bond angles**

|                    |            |                    |            |
|--------------------|------------|--------------------|------------|
| O(1)-U(1)-O(3)#2   | 150.17(12) | O(1)-U(1)-O(4)#2   | 156.85(12) |
| O(2)#1-U(1)-O(1)   | 79.74(12)  | O(7)-U(1)-O(6)     | 178.27(18) |
| O(2)#1-U(1)-O(3)#2 | 130.08(12) | O(2)#1-U(1)-O(4)#2 | 77.17(12)  |
| O(2)#1-U(1)-O(5)   | 155.66(14) | O(5)-U(1)-O(1)     | 75.95(14)  |
| O(5)-U(1)-O(3)#2   | 74.22(14)  | O(5)-U(1)-O(4)#2   | 127.16(13) |
| O(6)-U(1)-O(1)     | 91.32(16)  | O(6)-U(1)-O(2)#1   | 87.77(16)  |
| O(6)-U(1)-O(3)#2   | 89.42(17)  | O(6)-U(1)-O(4)#2   | 89.53(17)  |
| O(6)-U(1)-O(5)     | 91.46(18)  | O(7)-U(1)-O(1)     | 88.72(15)  |
| O(7)-U(1)-O(2)#1   | 90.54(16)  | O(7)-U(1)-O(3)#2   | 91.40(17)  |
| O(7)-U(1)-O(4)#2   | 89.76(16)  | O(7)-U(1)-O(5)     | 90.23(18)  |

Symmetrical code: #1  $-x, 2-y, -z$ ; #2  $x-1, y, z$ ; #3  $x-1, y-1, z$ .

---

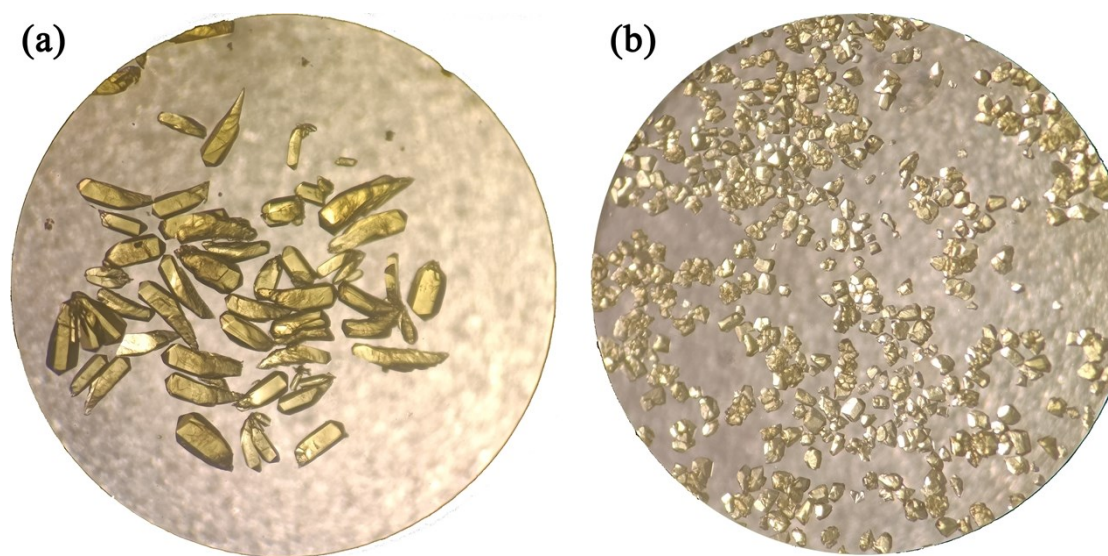

**Fig. S1** Photographs of crystal **1** and **2** under light field (forty times magnified).

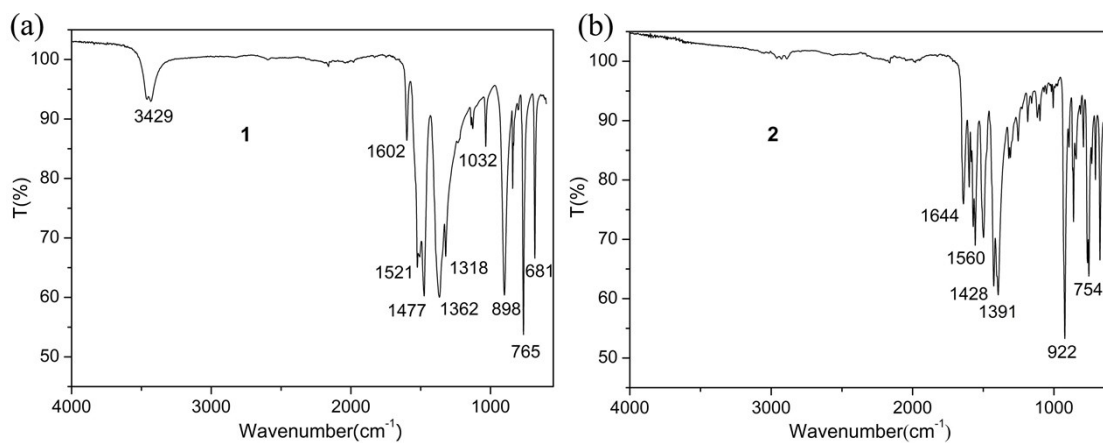

**Fig. S2** IR spectra of **1** and **2**.

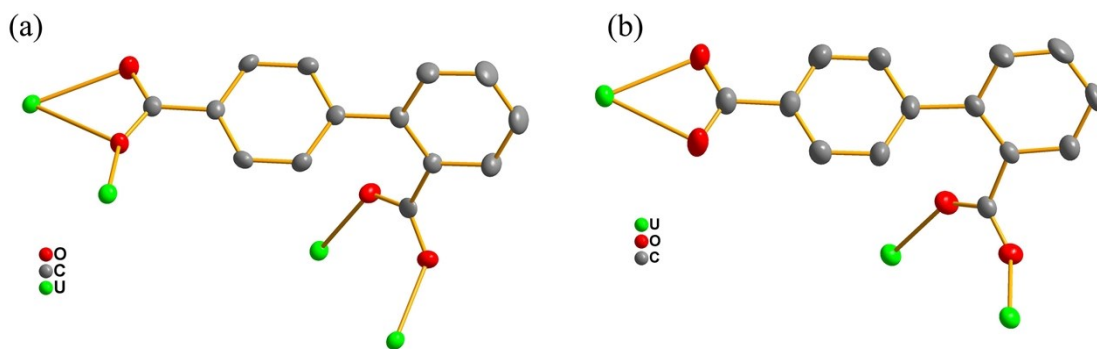

**Fig. S3** Coordination modes of bpda in **1** (a) and **2** (b).

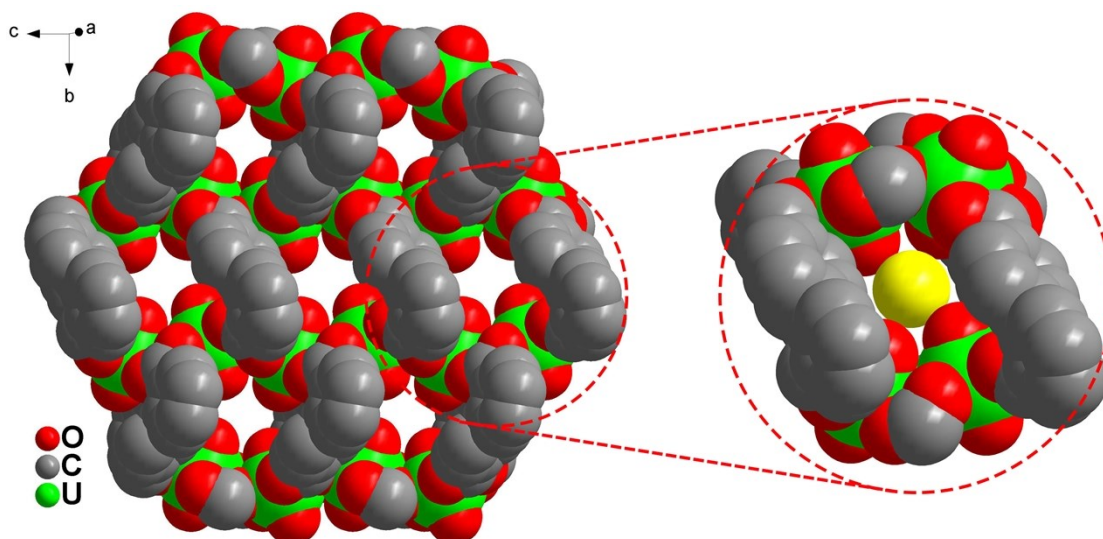

**Fig. S4** Space-filling mode of the 2D honeycomb network of **1** with pore diameter of 3.0 Å.

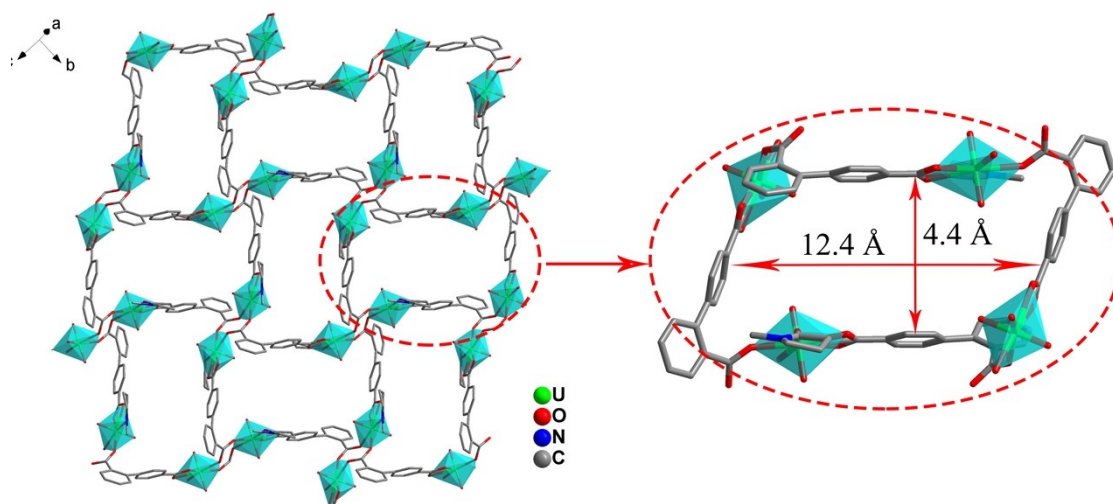

**Fig. S5** 2D rectangular sheet structure of **2** with size of  $12.4 \text{ \AA} \times 4.4 \text{ \AA}$  (the Van der Waals radius of carbons were subtracted).

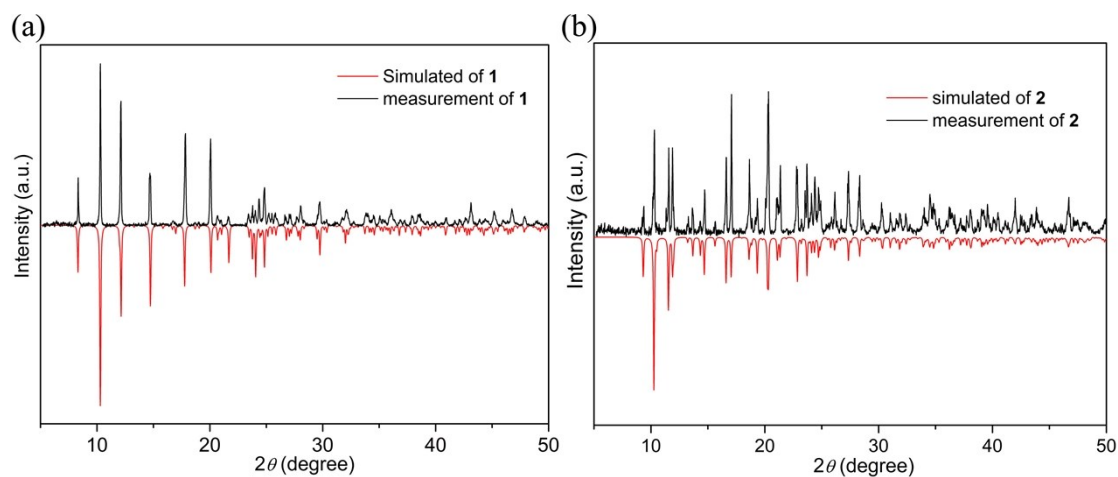

**Fig. S6** The PXRD patterns of **1** (a) and **2** (b).

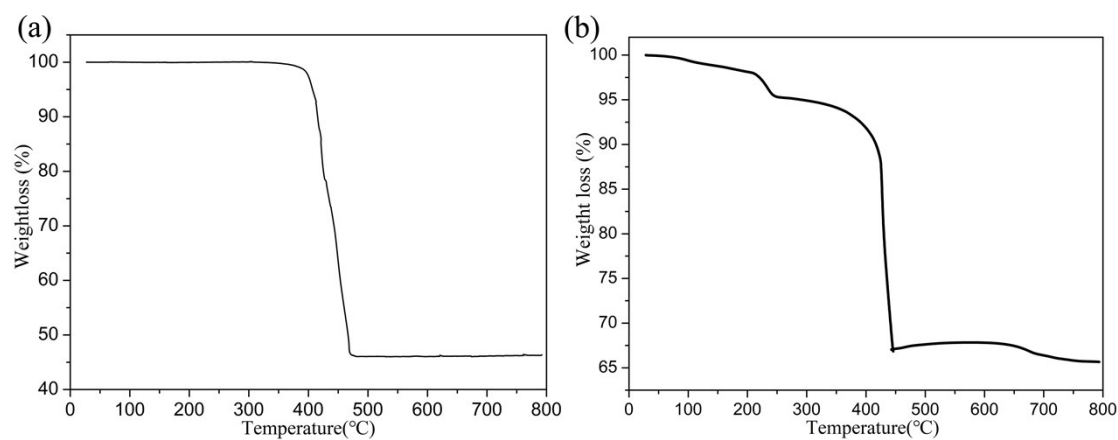

**Fig. S7** TGA profiles of **1** (a) and **2** (b).

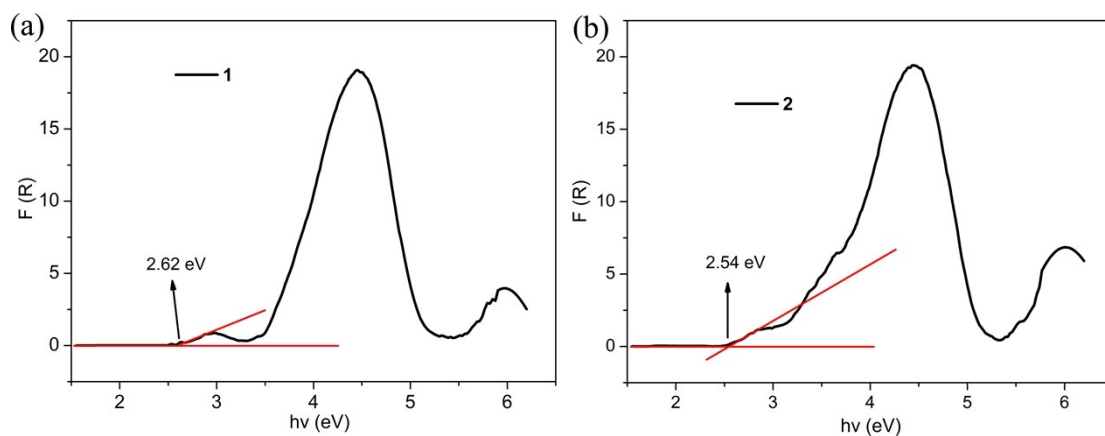

**Fig. S8** The calculated band gaps of **1** and **2** based on the  $(ah\nu)^2-h\nu$  curves.

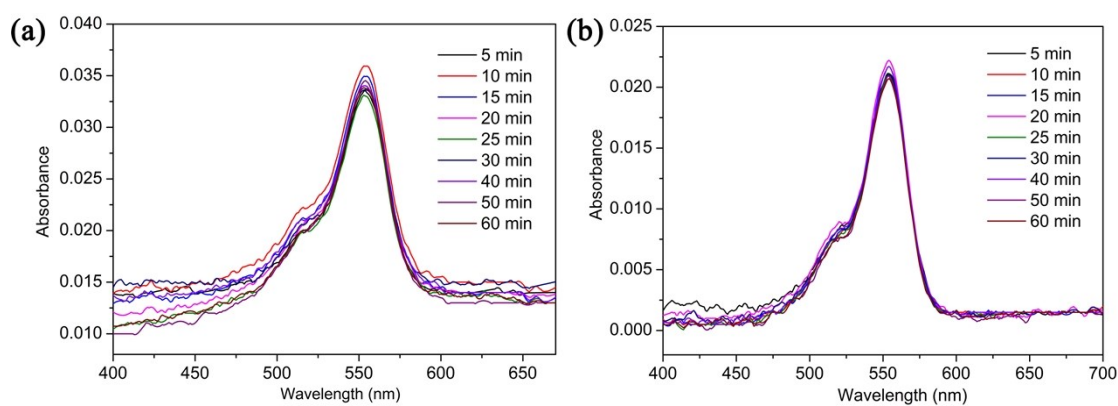

**Fig. S9** UV/Vis spectra of RhB solutions in the presence of **1** (a) or **2** (b) measured at different time.

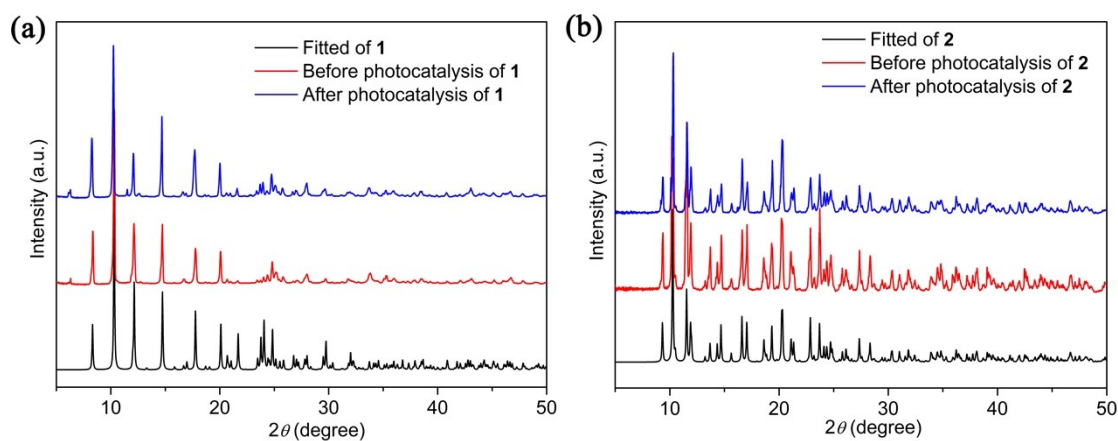

**Fig. S10** Comparison of the PXRD patterns of **1** (a) and **2** (b) before and after photocatalysis experiment.
